# Supplementary material
Source: PubMed Central journal article supplement (PMC3045645)
Supplement: NIHMS263677-supplement-1_si_001.pdf [file NIHMS263677-supplement-1_si_001.pdf]

## ***Supporting Information for***

### **Natural and Semisynthetic Mammea-Type Isoprenylated Dihydroxycoumarins Uncouple Cellular Respiration**

Lin Du,<sup>†</sup> Fakhri Mahdi,<sup>†</sup> Mika B. Jekabsons,<sup>‡</sup> Dale G. Nagle,<sup>\*,†,§</sup> and Yu-Dong Zhou<sup>\*,†</sup>

*Department of Pharmacognosy and Research Institute of Pharmaceutical Sciences, School of Pharmacy, University of Mississippi, University, Mississippi 38677; Department of Biology, University of Mississippi, University, Mississippi 38677*

\*Joint corresponding authors. Tel: (662) 915-7026. Fax: (662) 915-6975. E-mail: [dnagle@olemiss.edu](mailto:dnagle@olemiss.edu) (D.G.N.). Tel: (662) 915-7026. Fax: (662) 915-6975. E-mail: [ydzhou@olemiss.edu](mailto:ydzhou@olemiss.edu) (Y.-D.Z.).

<sup>†</sup>Department of Pharmacognosy.

<sup>‡</sup>Department of Biology.

<sup>§</sup>Research Institute of Pharmaceutical Sciences.

## Table of contents

|                                                                                                                                                                             |            |
|-----------------------------------------------------------------------------------------------------------------------------------------------------------------------------|------------|
| <sup>1</sup> H-NMR (CDCl <sub>3</sub> ) spectrum of compound <b>1</b> .....                                                                                                 | <b>S3</b>  |
| <sup>13</sup> C-NMR (CDCl <sub>3</sub> ) spectrum of compound <b>1</b> .....                                                                                                | <b>S4</b>  |
| <sup>1</sup> H-NMR (CDCl <sub>3</sub> ) spectrum of compound <b>2</b> .....                                                                                                 | <b>S5</b>  |
| <sup>13</sup> C-NMR (CDCl <sub>3</sub> ) spectrum of compound <b>2</b> .....                                                                                                | <b>S6</b>  |
| <sup>1</sup> H-NMR (CDCl <sub>3</sub> ) spectrum of compound <b>3</b> .....                                                                                                 | <b>S7</b>  |
| <sup>13</sup> C-NMR (CDCl <sub>3</sub> ) spectrum of compound <b>3</b> .....                                                                                                | <b>S8</b>  |
| <sup>1</sup> H-NMR (CDCl <sub>3</sub> ) spectrum of compound <b>M-1</b> .....                                                                                               | <b>S9</b>  |
| <sup>1</sup> H-NMR (CDCl <sub>3</sub> ) spectrum of compound <b>M-2</b> .....                                                                                               | <b>S10</b> |
| <sup>1</sup> H-NMR (CDCl <sub>3</sub> ) spectrum of compound <b>M-3</b> .....                                                                                               | <b>S11</b> |
| <sup>1</sup> H-NMR (CDCl <sub>3</sub> ) spectrum of compound <b>M-4</b> .....                                                                                               | <b>S12</b> |
| <sup>1</sup> H-NMR (CDCl <sub>3</sub> ) spectrum of compound <b>A-1</b> .....                                                                                               | <b>S13</b> |
| <sup>1</sup> H-NMR (CDCl <sub>3</sub> ) spectrum of compound <b>A-2</b> .....                                                                                               | <b>S14</b> |
| <sup>1</sup> H-NMR (CDCl <sub>3</sub> ) spectrum of compound <b>A-3</b> .....                                                                                               | <b>S15</b> |
| <b>Table S1.</b> IC <sub>50</sub> values of <b>1 – 14</b> , <b>M-1 – M-4</b> , and <b>A-1 – A-3</b> suppressing<br>HIF-1 activation in a PC3 cell-based reporter assay..... | <b>S16</b> |
| <b>Table S2.</b> Purity of compounds evaluated in bioassays.....                                                                                                            | <b>S17</b> |

**<sup>1</sup>H-NMR (CDCl<sub>3</sub>) spectrum of compound 1**

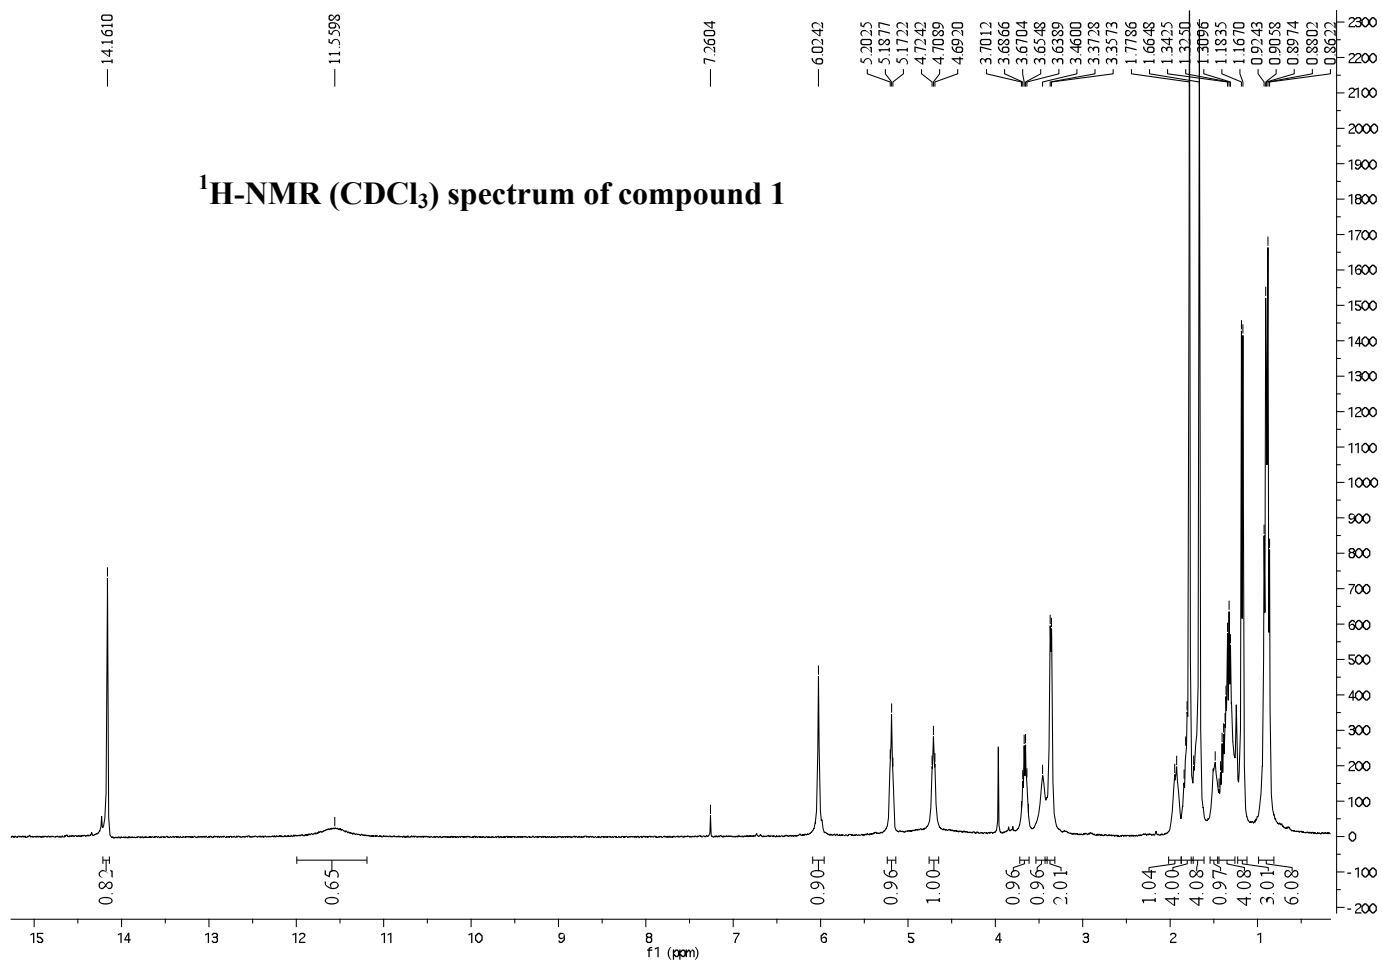

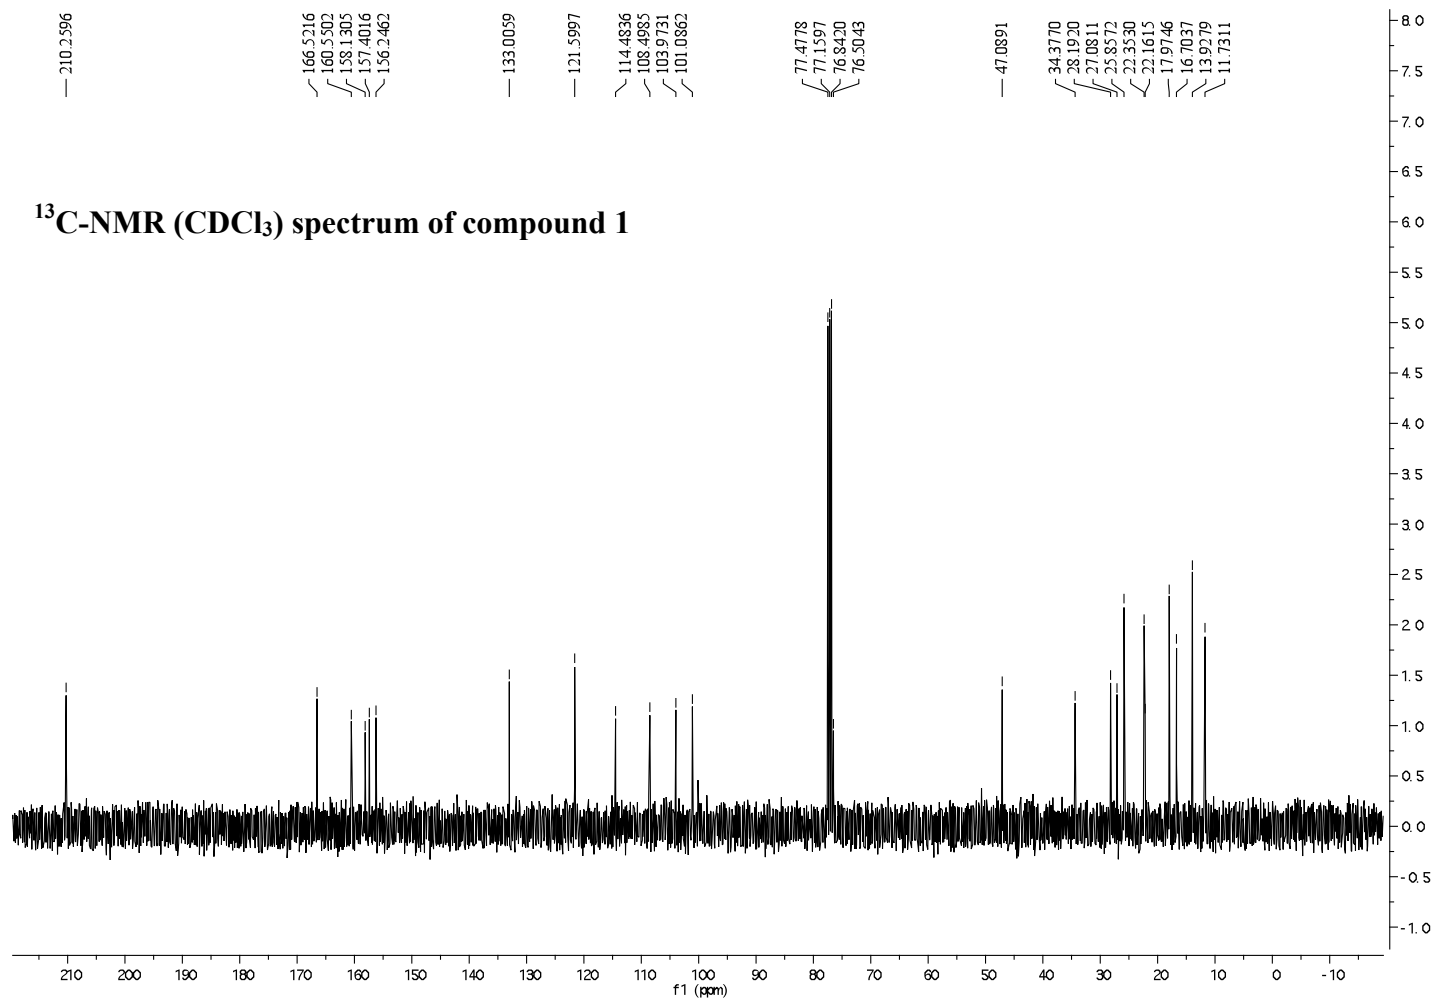

**<sup>1</sup>H-NMR (CDCl<sub>3</sub>) spectrum of compound 2**

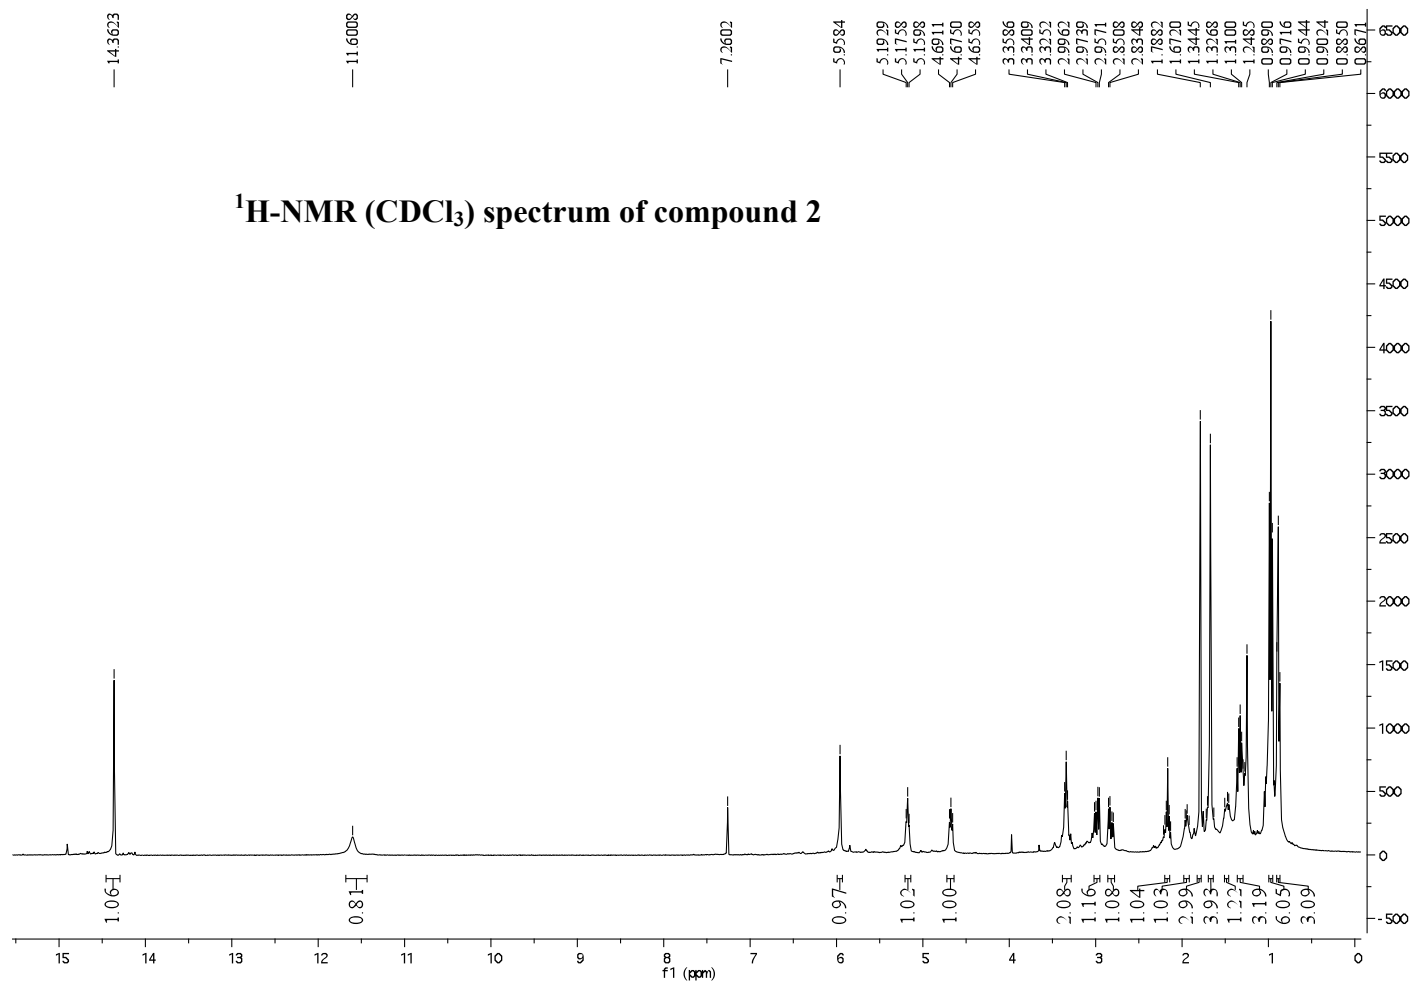

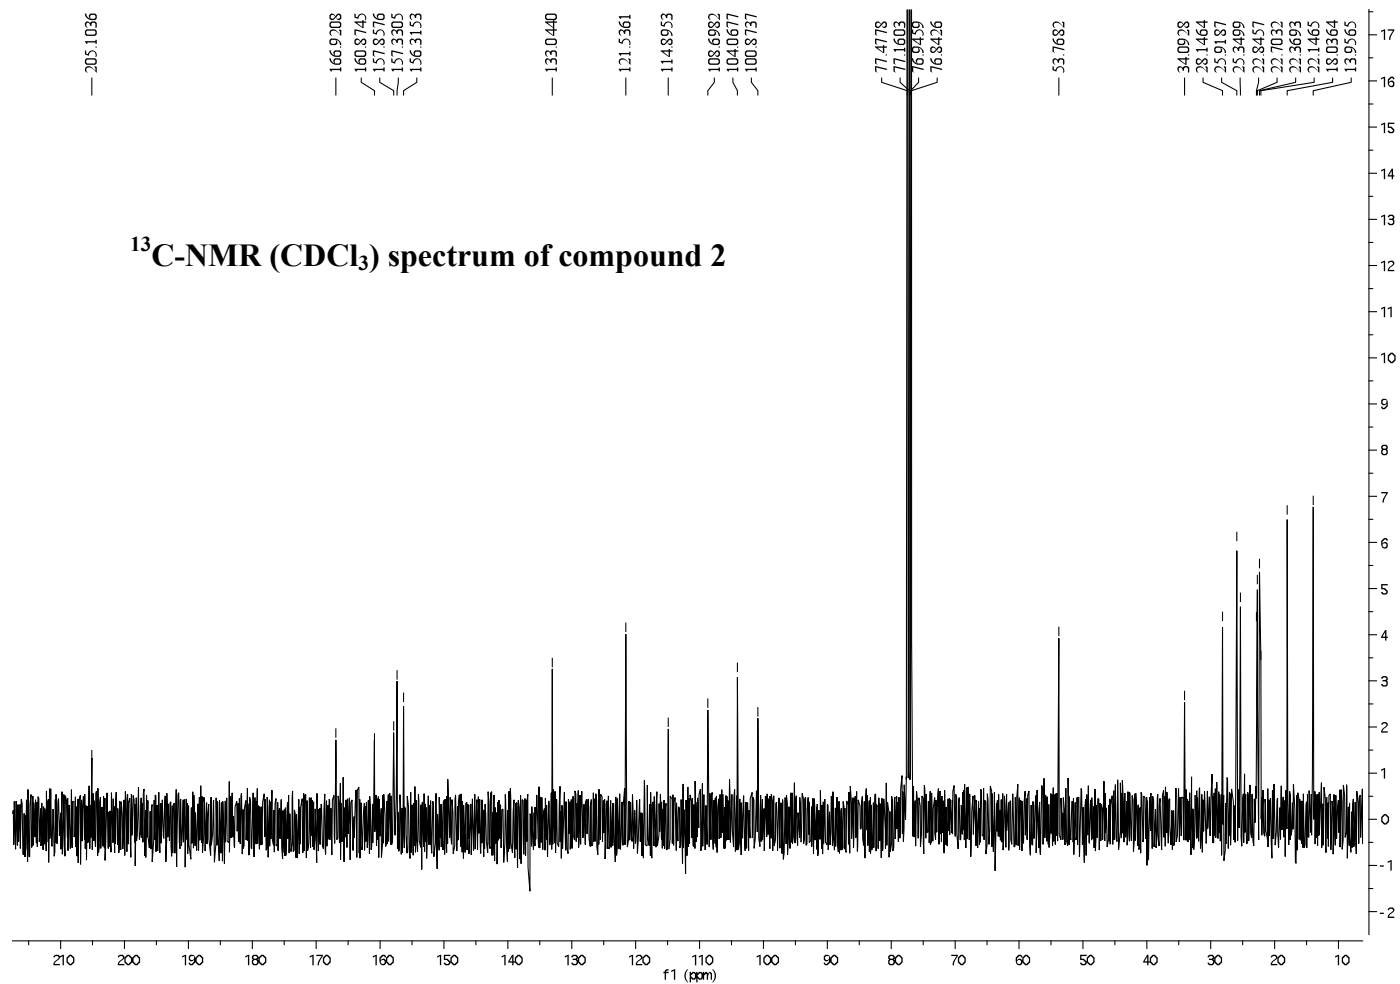

**<sup>1</sup>H-NMR (CDCl<sub>3</sub>) spectrum of compound 3**

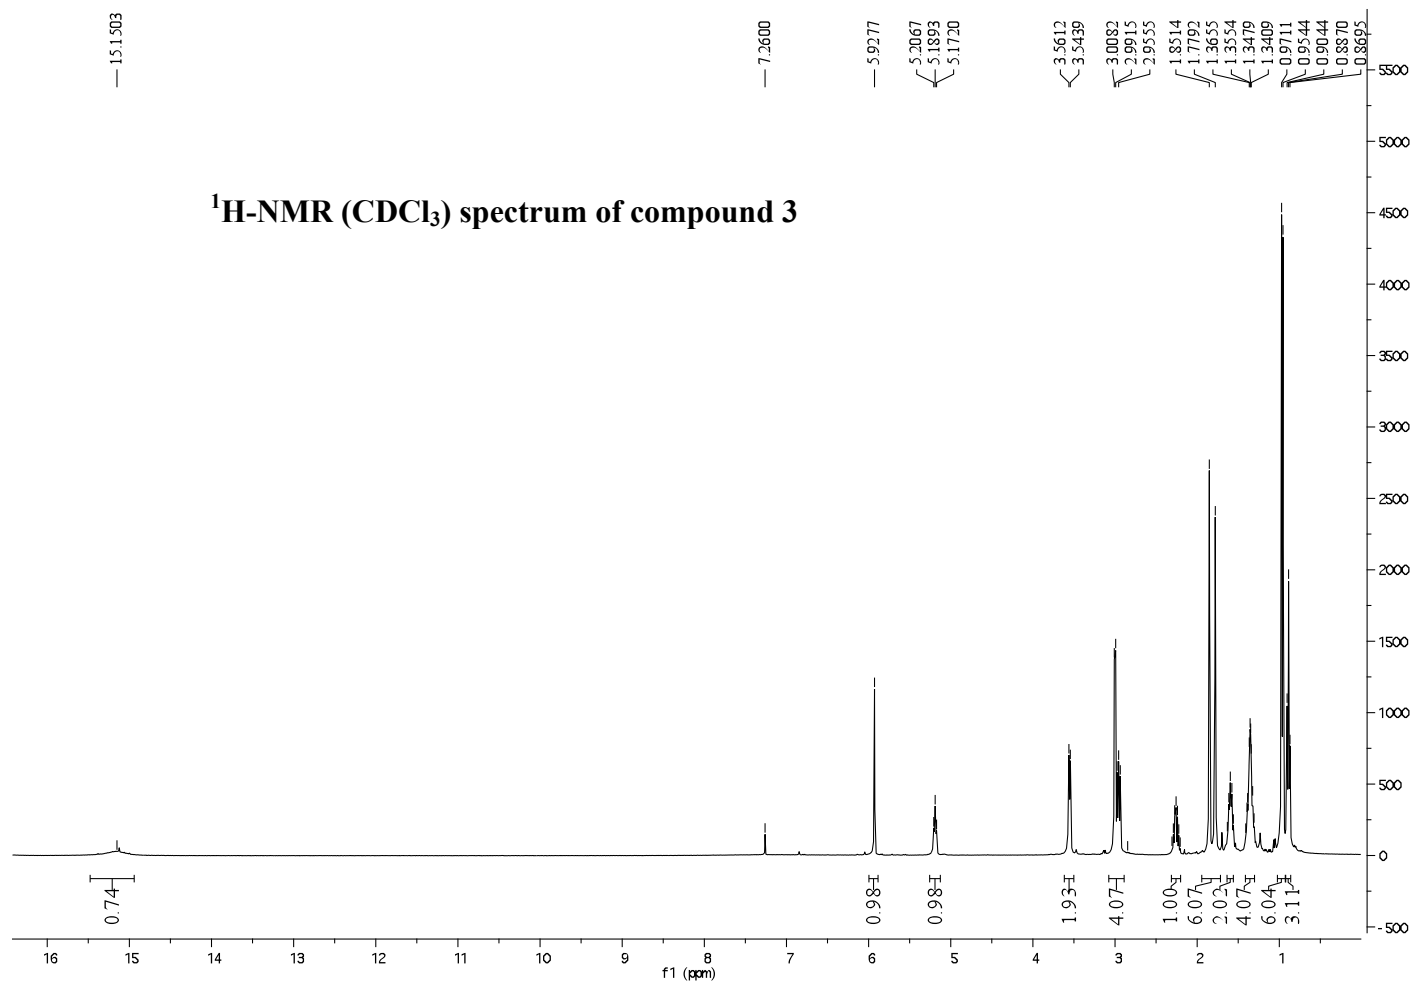

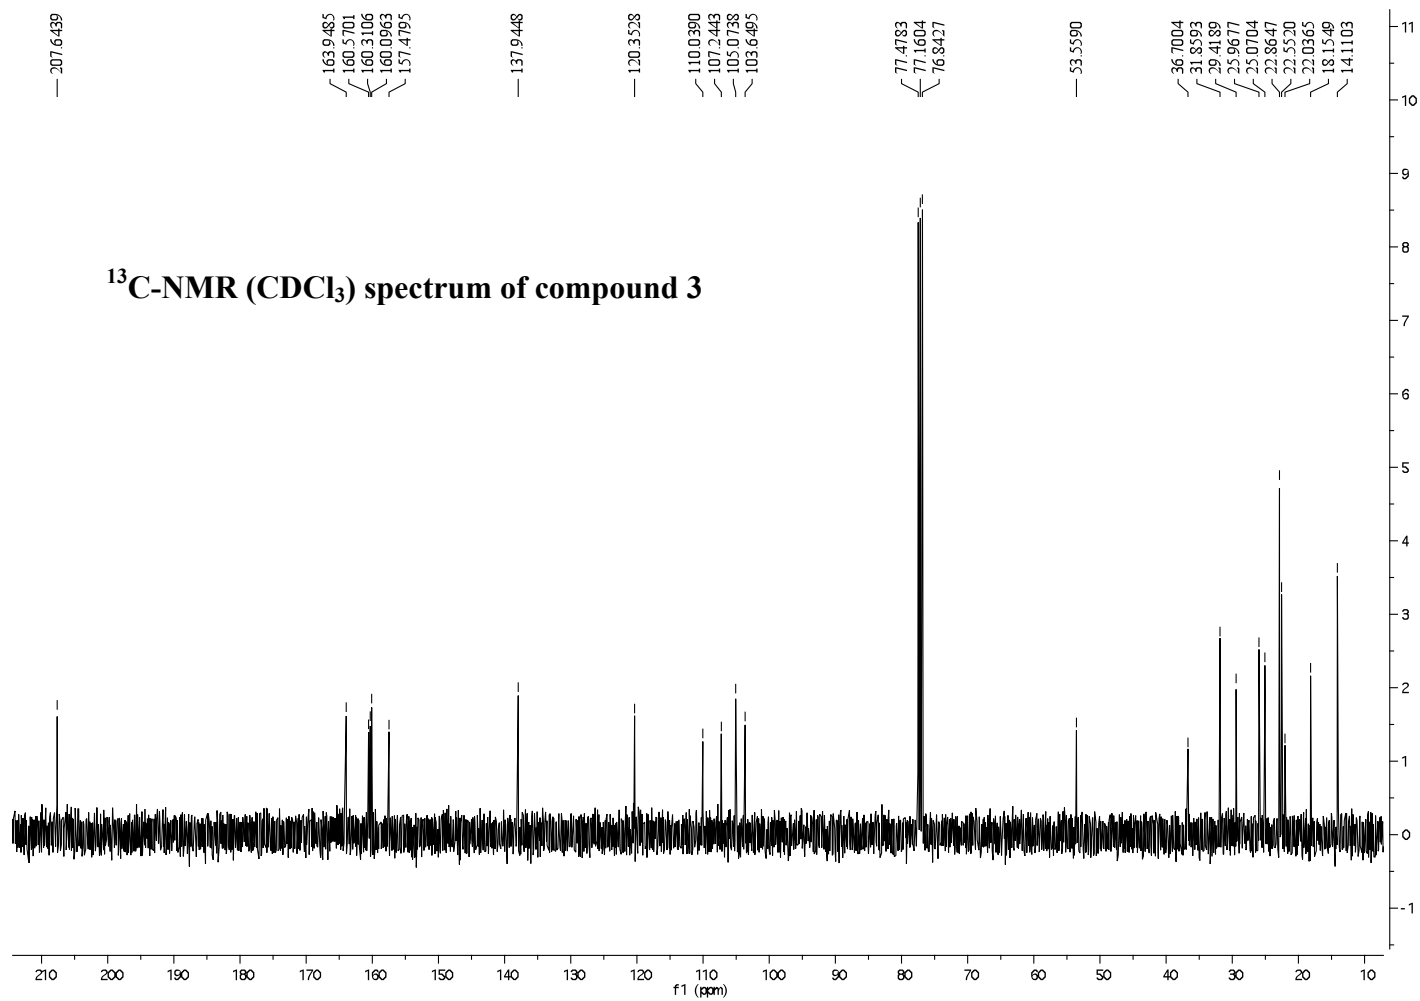



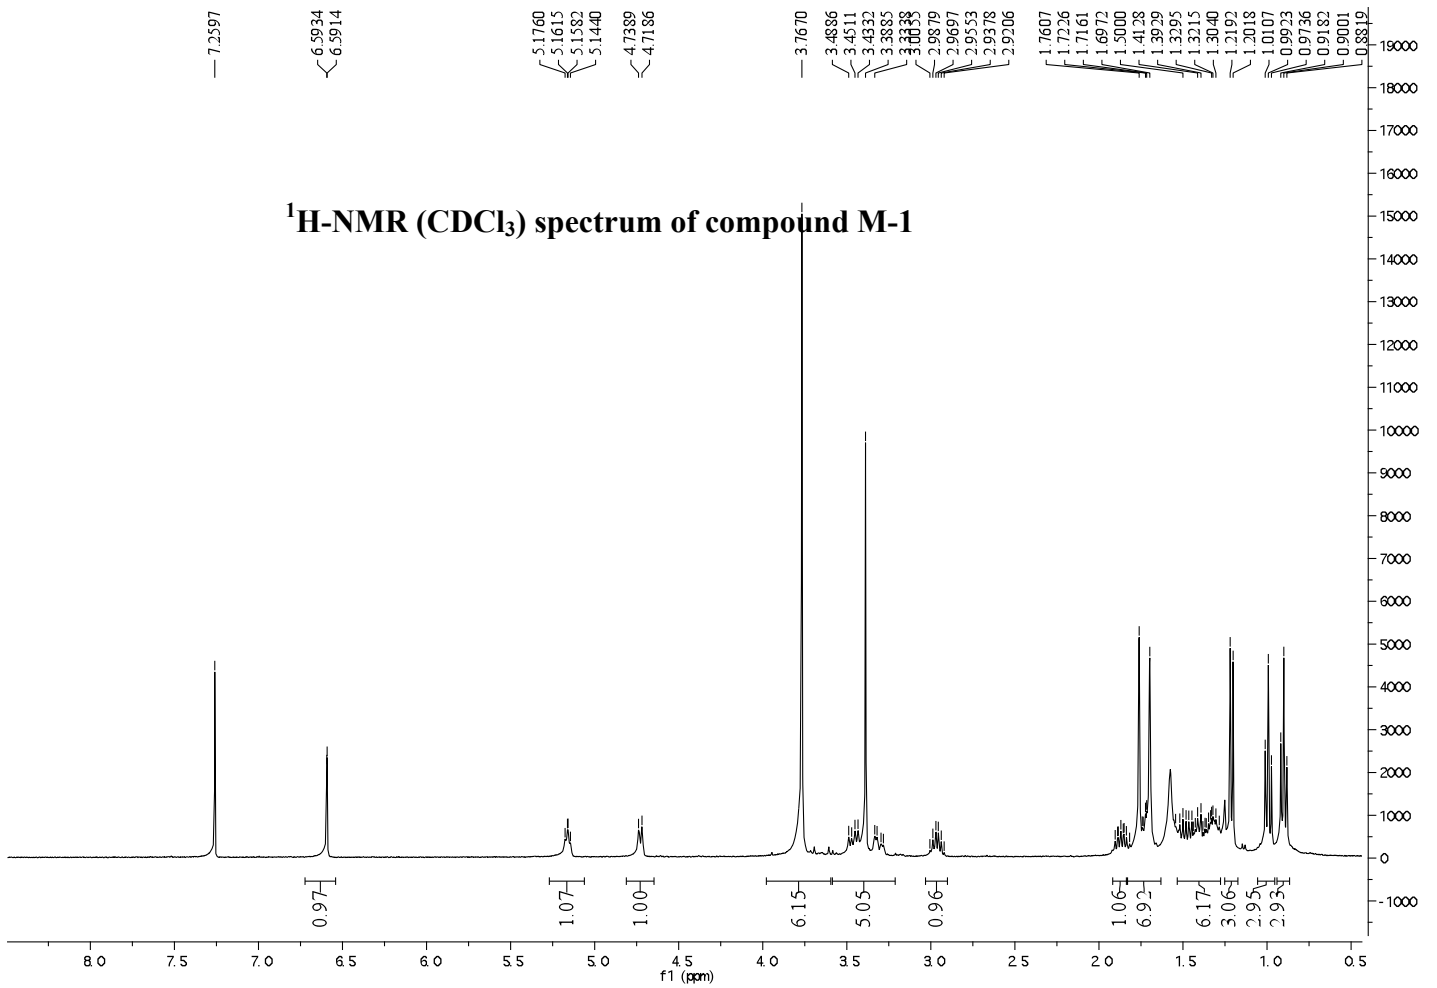

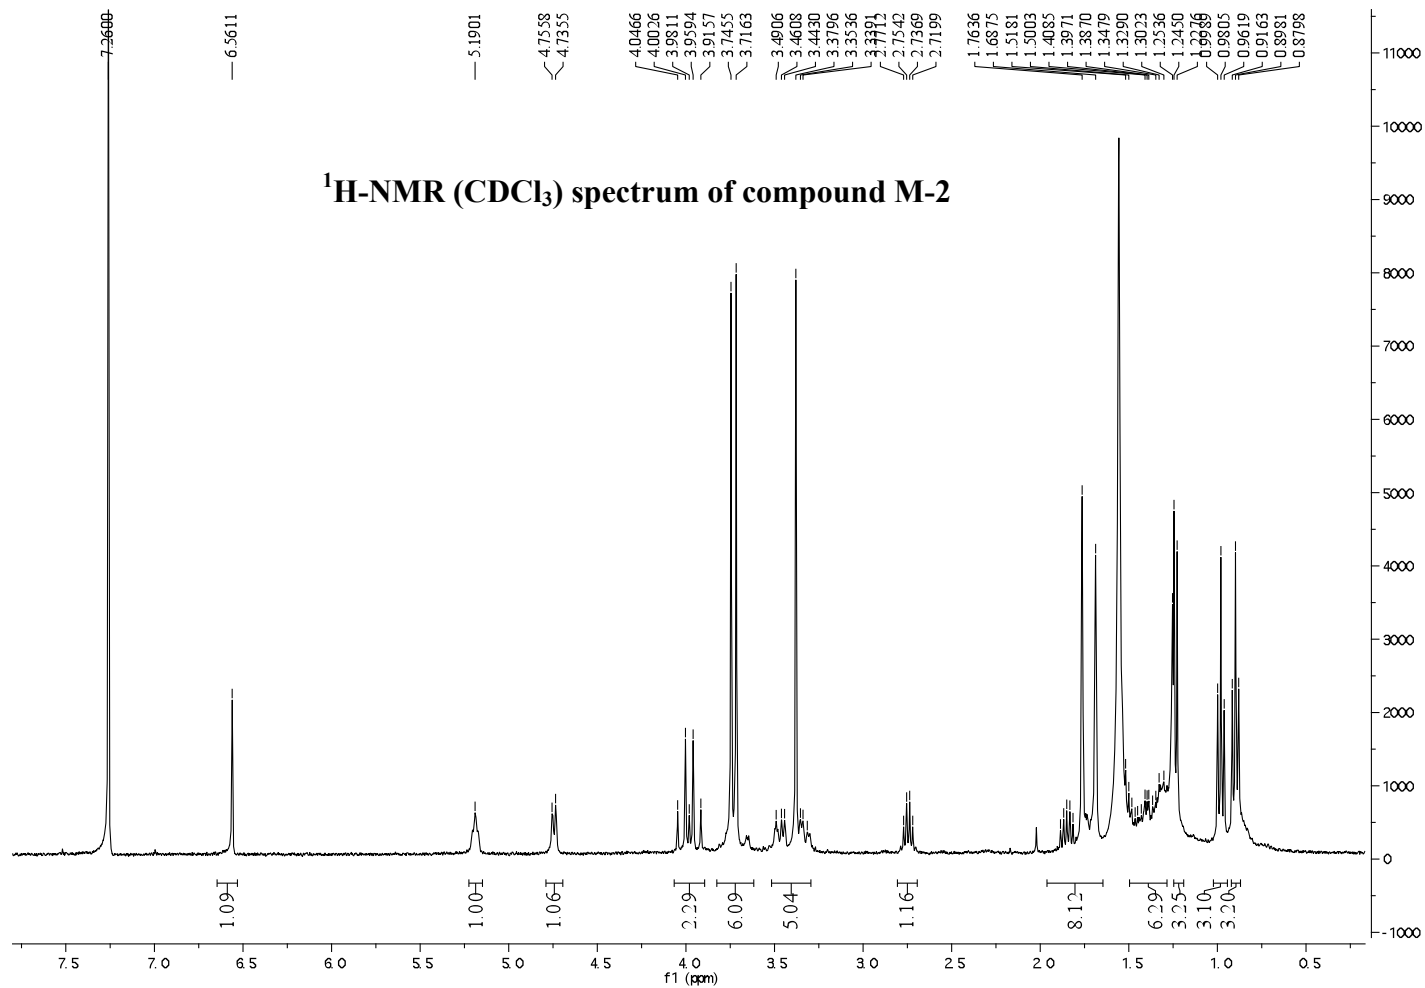

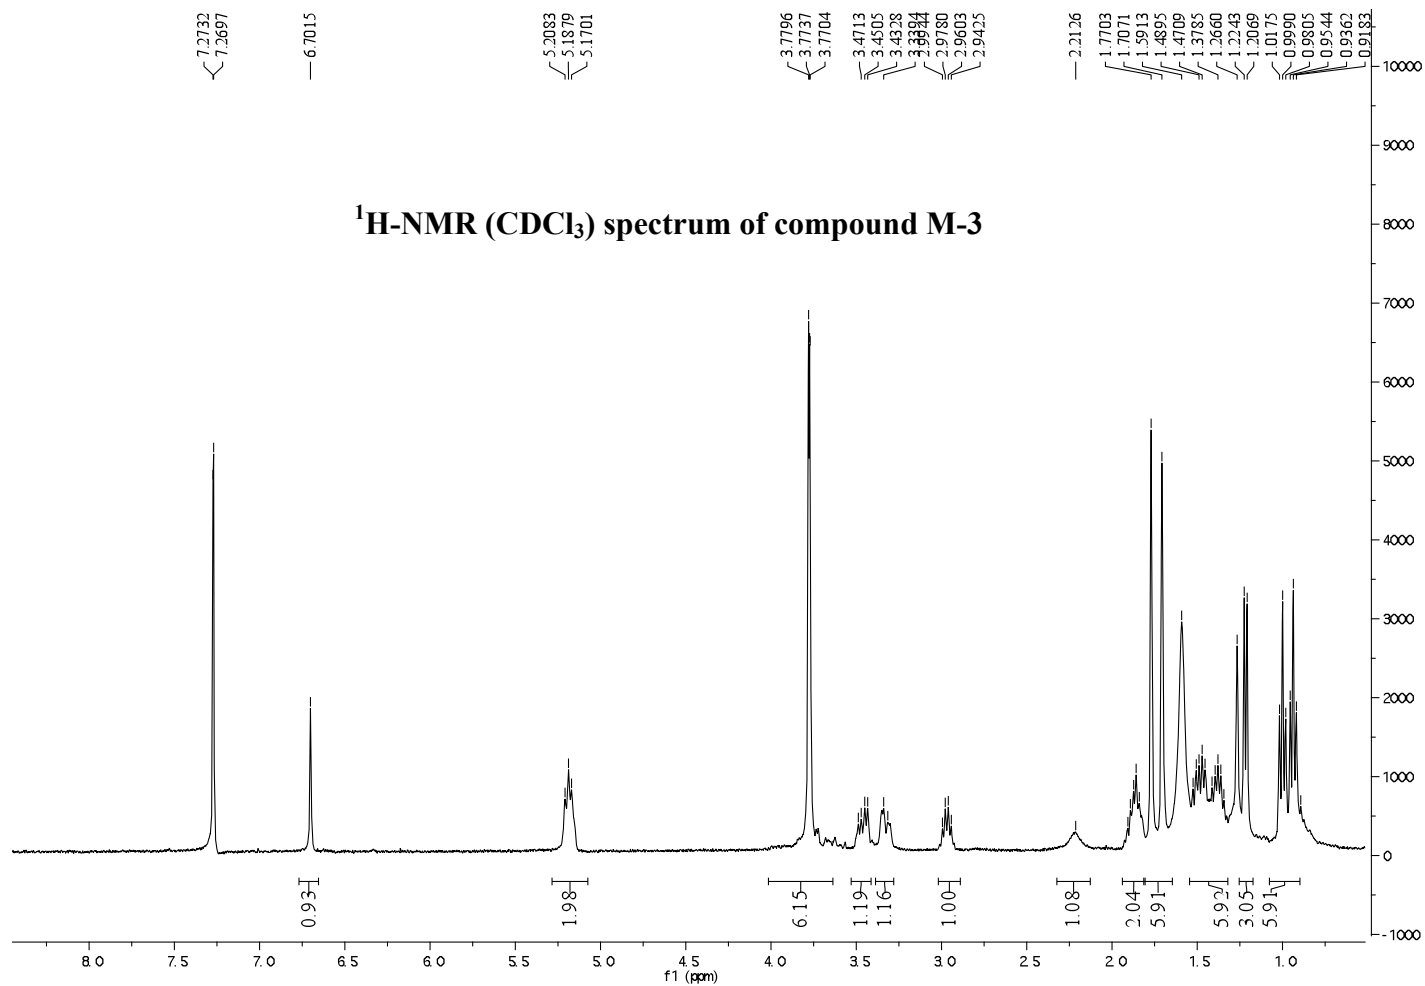

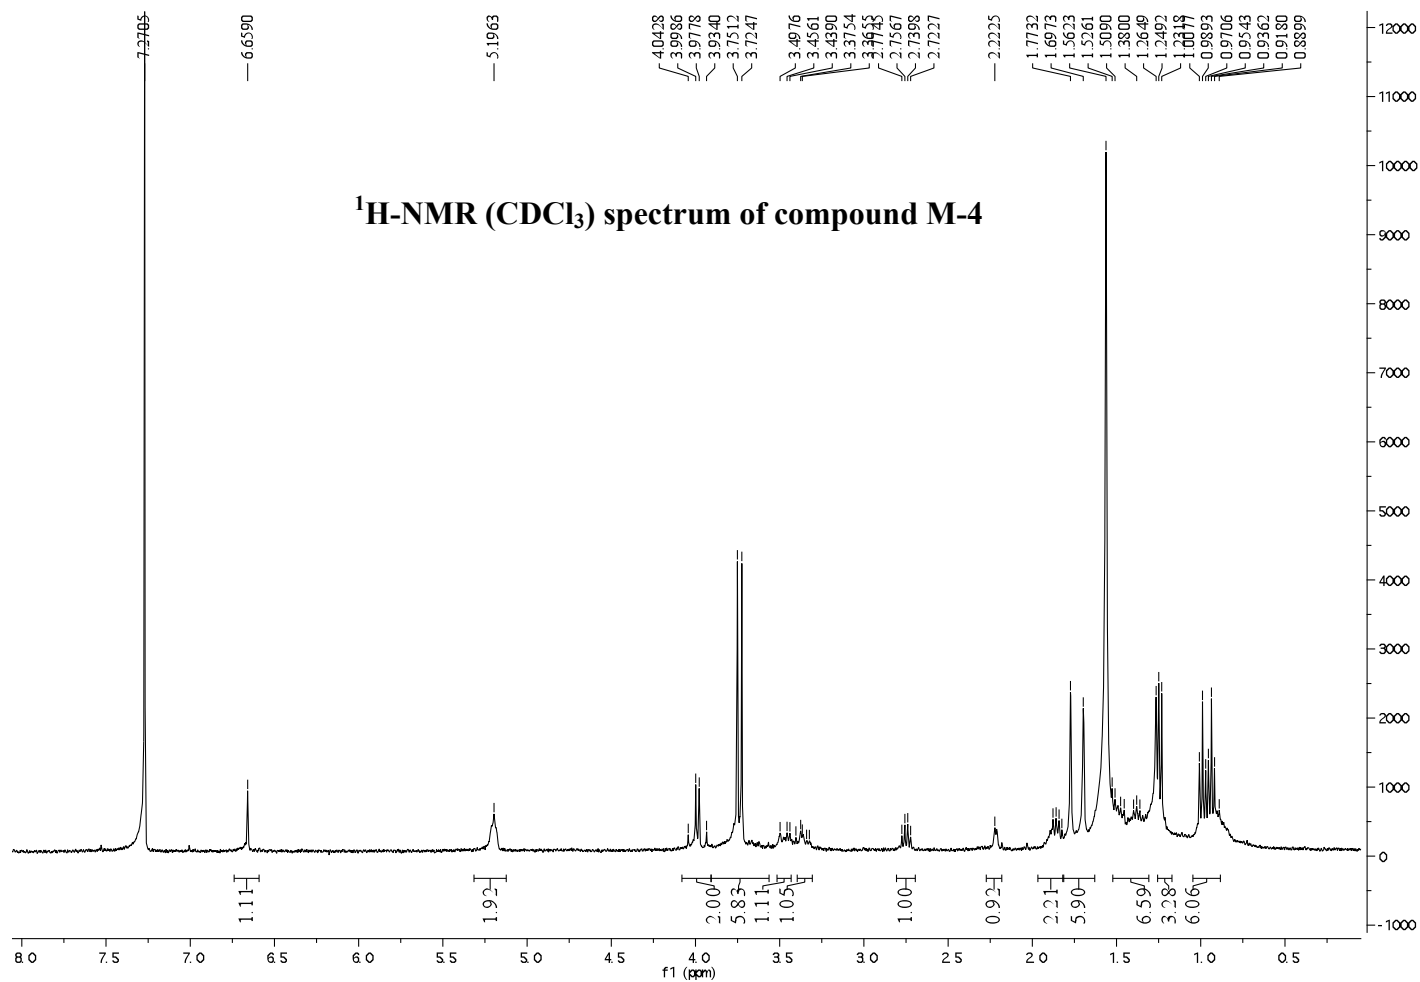

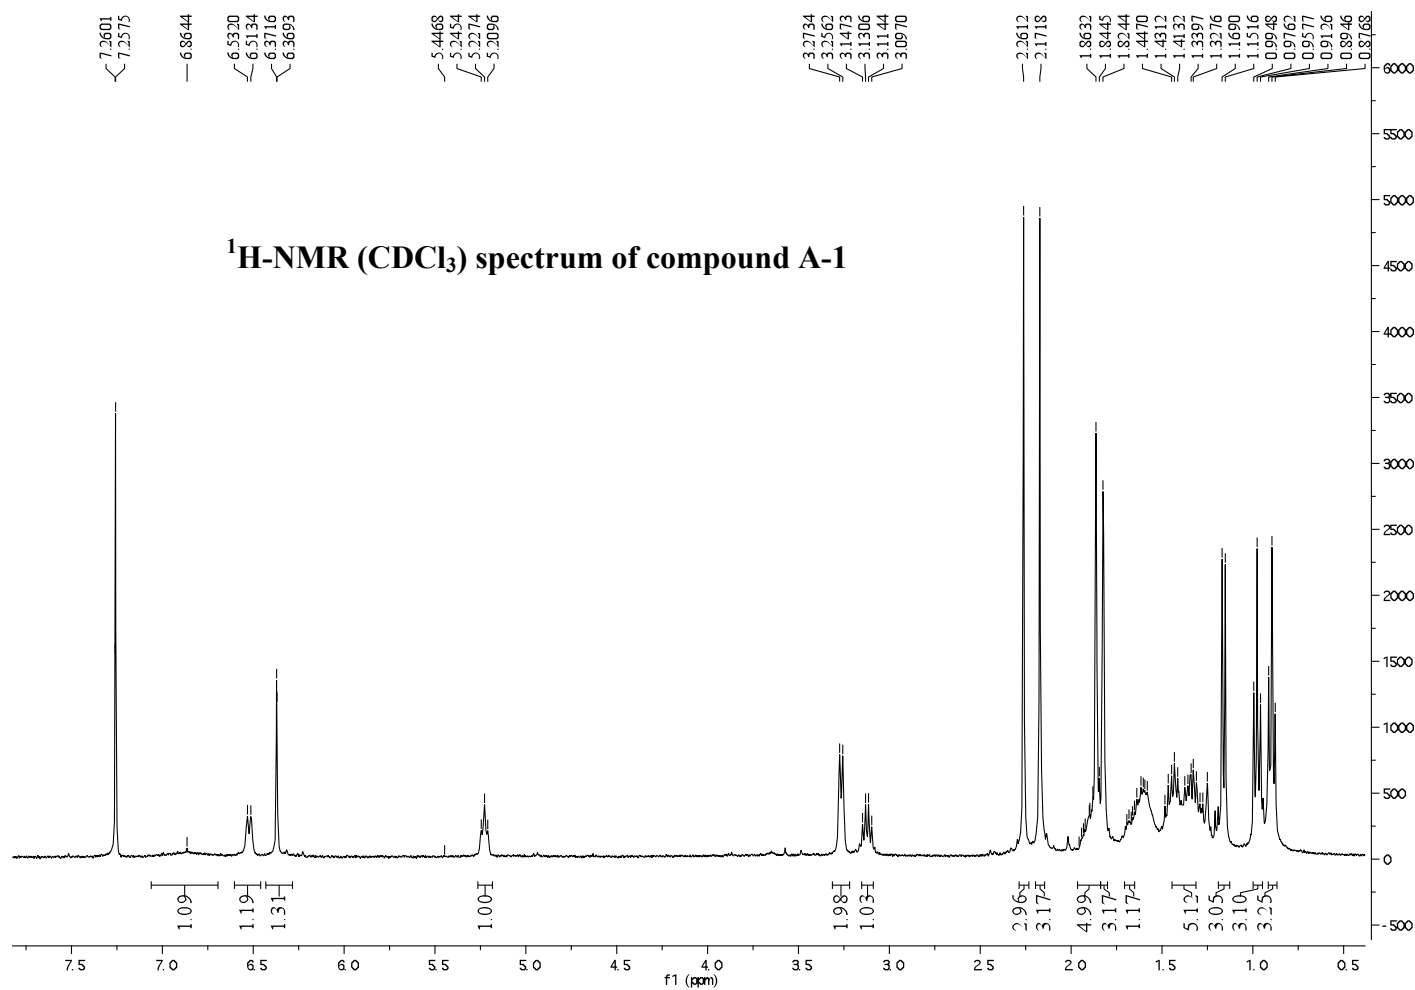

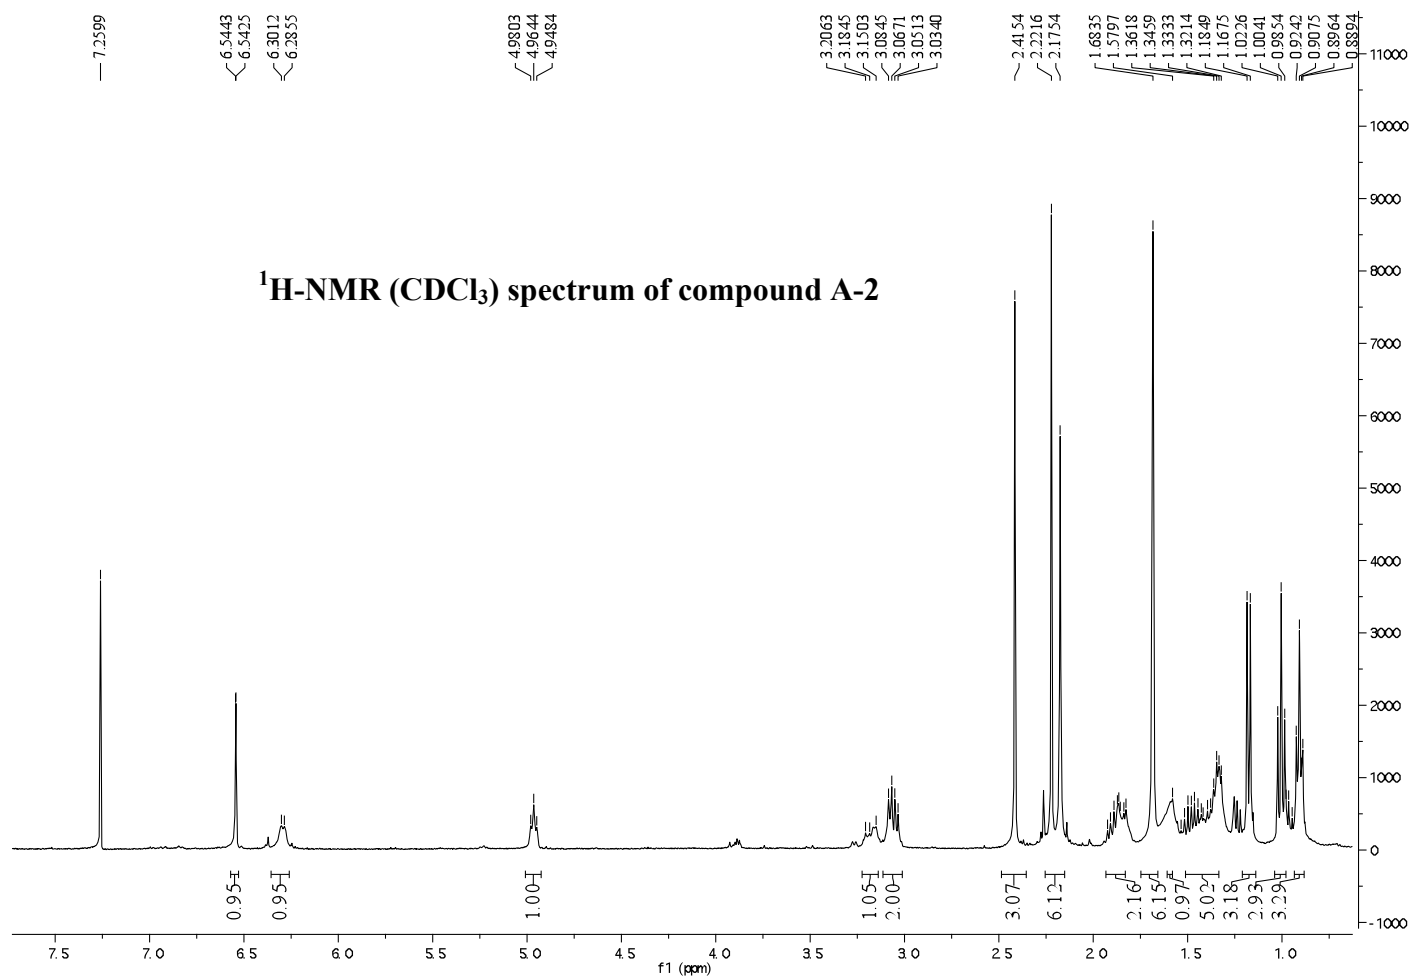

# <sup>1</sup>H-NMR (CDCl<sub>3</sub>) spectrum of compound A-3

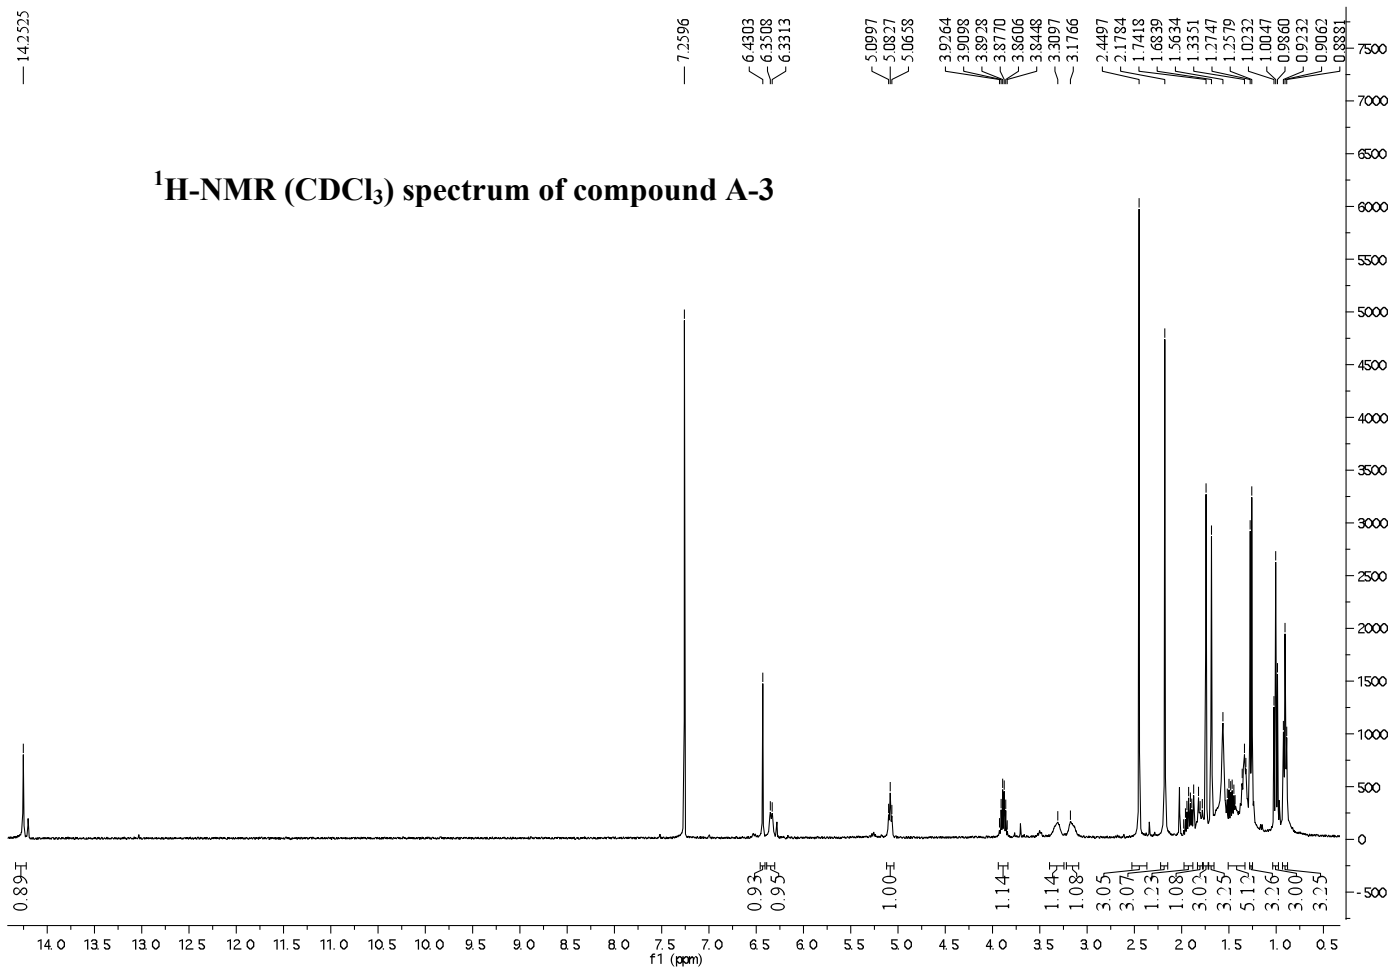

**Table S1.** IC<sub>50</sub> values of **1 – 14**, **M-1 – M-4**, and **A-1 – A-3** suppressing HIF-1 activation in a PC3 cell-based reporter assay. The IC<sub>50</sub> and 95% CI values were determined from one experiment performed in triplicate. The data on mammea E/BB (**15**) were from an earlier publication.<sup>10</sup>

| Compound   | 1% O <sub>2</sub> , 16 h |                 | 10 μM 1,10-phen, 16 h  |                 |
|------------|--------------------------|-----------------|------------------------|-----------------|
|            | IC <sub>50</sub><br>μM   | (95% CI)<br>μM  | IC <sub>50</sub><br>μM | (95% CI)<br>μM  |
| <b>1</b>   | 4.50                     | (4.15 - 4.88)   | 5.14                   | (3.91 - 6.76)   |
| <b>2</b>   | 2.48                     | (2.30 - 2.69)   | 4.23                   | (3.14 - 5.70)   |
| <b>3</b>   | 4.88                     | (4.55 - 5.24)   | 8.02                   | (6.16 - 10.43)  |
| <b>4</b>   | 5.24                     | (4.82 - 5.70)   | 8.37                   | (6.58 - 10.66)  |
| <b>5</b>   | 2.97                     | (2.75 - 3.21)   | 5.33                   | (4.13 - 6.86)   |
| <b>6</b>   | 3.65                     | (3.39 - 3.94)   | 6.66                   | (5.51 - 8.05)   |
| <b>7</b>   | 9.90                     | (9.49 - 10.57)  | 11.33                  | (9.21 - 13.95)  |
| <b>8</b>   | 10.29                    | (9.48 - 11.17)  | 12.77                  | (11.44 - 15.19) |
| <b>9</b>   | 6.94                     | (5.96 - 8.08)   | 13.38                  | (7.15 - 25.05)  |
| <b>10</b>  | >20                      | NA              | 14.88                  | (11.56 - 19.15) |
| <b>11</b>  | 9.36                     | (8.15 - 10.75)  | 13.90                  | (8.29 - 23.30)  |
| <b>12</b>  | 7.33                     | (6.21 - 8.66)   | 16.38                  | (8.89 - 30.18)  |
| <b>13</b>  | 6.78                     | (5.86 - 7.84)   | 7.55                   | (5.14 - 11.09)  |
| <b>14</b>  | 11.43                    | (9.99 - 13.08)  | 10.56                  | (8.34 - 13.38)  |
| <b>M-1</b> | >20                      | NA              | >20                    | NA              |
| <b>M-2</b> | 18.18                    | (11.20 - 29.49) | >20                    | NA              |
| <b>M-3</b> | 8.67                     | (6.76 - 11.13)  | 15.71                  | (13.12 - 18.81) |
| <b>M-4</b> | 14.16                    | (11.35 - 17.67) | >20                    | NA              |
| <b>A-1</b> | 9.88                     | (8.73 - 11.19)  | 6.87                   | (6.15 - 7.67)   |
| <b>A-2</b> | 0.94                     | (0.79 - 1.11)   | 2.87                   | (2.53 - 3.25)   |
| <b>A-3</b> | 2.24                     | (2.04 - 2.46)   | 4.16                   | (3.62 - 4.78)   |
| <b>15</b>  | 2.05                     | (1.83 - 2.30)   | 6.57                   | (5.08 - 8.49)   |



| <b>Compound</b> | <b>Purity</b> |
|-----------------|---------------|
| <b>1</b>        | 97.4%         |
| <b>2</b>        | 99.1%         |
| <b>3</b>        | 95.6%         |
| <b>4</b>        | 97.2%         |
| <b>5</b>        | 96.3%         |
| <b>6</b>        | 98.2%         |
| <b>7</b>        | 95.4%         |
| <b>8</b>        | 96.1%         |
| <b>9</b>        | 97.2%         |
| <b>10</b>       | 95.2%         |
| <b>11</b>       | 95.3%         |
| <b>12</b>       | 96.7%         |
| <b>13</b>       | 96.8%         |
| <b>14</b>       | 95.2%         |
| <b>M-1</b>      | 98.8%         |
| <b>M-2</b>      | 98.7%         |
| <b>M-3</b>      | 97.6%         |
| <b>M-4</b>      | 97.4%         |
| <b>A-1</b>      | 96.5%         |
| <b>A-2</b>      | 98.3%         |
| <b>A-3</b>      | 97.7%         |
| <b>15</b>       | 98.1%         |

**Table S2.** The purity of all compounds was judged on the percentage of the integrated signal at UV 220 nm.
